1 Genetics of recombination rate variation in the pig

2

3 Martin Johnsson<sup>1,2\*</sup>, Andrew Whalen<sup>1\*</sup>, Roger Ros-Freixedes<sup>1,3</sup>, Gregor Gorjanc<sup>1</sup>, Ching-Yi  
4 Chen<sup>4</sup>, William O. Herring<sup>4</sup>, Dirk-Jan de Koning<sup>2</sup>, John M. Hickey<sup>1†</sup>

5

6 1 The Roslin Institute and Royal (Dick) School of Veterinary Studies, The University of  
7 Edinburgh, Midlothian, EH25 9RG, Scotland, United Kingdom.

8 2 Department of Animal Breeding and Genetics, Swedish University of Agricultural  
9 Sciences, Box 7023, 750 07 Uppsala, Sweden.

10 3 Departament de Ciència Animal, Universitat de Lleida-Agrotecnio Center, Lleida, Spain.

11 4 Genus plc, 100 Bluegrass Commons Blvd., Ste122200, Hendersonville, TN 37075, USA.

12

13 \* Equal contributions

14 † Corresponding author

15 [john.hickey@roslin.ed.ac.uk](mailto:john.hickey@roslin.ed.ac.uk)

16

17 Abstract

18 *Background*

19 In this paper, we estimated recombination rate variation within the genome and between  
20 individuals in the pig using multiocus iterative peeling for 150,000 pigs across nine  
21 genotyped pedigrees. We used this to estimate the heritability of recombination and perform  
22 a genome-wide association study of recombination in the pig.

23

24 *Results*

25 Our results confirmed known features of the pig recombination landscape, including  
26 differences in chromosome length, and marked sex differences. The recombination landscape  
27 was repeatable between lines, but at the same time, the lines also showed differences in  
28 average genome-wide recombination rate. The heritability of genome-wide recombination  
29 was low but non-zero (on average 0.07 for females and 0.05 for males). We found three  
30 genomic regions associated with recombination rate, one of them harbouring the *RNF212*  
31 gene, previously associated with recombination rate in several other species.

32

33 *Conclusion*

34 Our results from the pig agree with the picture of recombination rate variation in vertebrates,  
35 with low but nonzero heritability, and a major locus that is homologous to one detected in  
36 several other species. This work also highlights the utility of using large-scale livestock data  
37 to understand biological processes.

38

## 39 Background

40

41 This paper shows that recombination rate in the pig (*Sus scrofa*) is genetically variable and  
42 associated with alleles at the *RNF212* gene.

43

44 Recombination causes exchange of genetic material between homologous chromosomes. At  
45 meiosis, after chromosomes have been paired up and duplicated, they break and exchange  
46 pieces of chromosome arms. These recombinations are not evenly distributed along  
47 chromosomes. This gives rise to a variable recombination rate landscape with peaks and  
48 troughs.

49

50 The recombination rate landscape of the pig has been estimated previously [1]. It shows  
51 broadly the same features as in other mammals: low recombination rate in the centre of  
52 chromosomes, local hotspots of high recombination rate, a correlation between  
53 recombination rate and the fraction of guanine and cytosine bases (GC content), and sex  
54 difference in recombination rate [2–4]. In this paper, we investigated how recombination rate  
55 varied between individuals and populations in the pig.

56

57 Recombination rate is genetically variable in several other species. Studies in humans [5, 6],  
58 cattle [7–10], deer [11], sheep [12, 13] and chickens [14] have observed genetic influence on  
59 recombination rate, and genetic associations with alleles at a handful of genes involved in  
60 meiosis, including *RNF212*, *REC8* and *PRDM9* (reviewed by [15, 16]).

61

62 To be able to analyse the genetic basis of recombination, we need recombination estimates  
63 from a large number related pigs. Recombination rate can be estimated by phasing genotypes  
64 in pedigrees [17–20], by direct counting in gametes [21, 22], or by measuring linkage  
65 disequilibrium in population samples [2]. Counting methods require specific experiments to

66 gather data. Linkage disequilibrium methods only provide averages for a population. In this  
67 paper, we used a new pedigree method based on multilocus iterative peeling [23, 24] to  
68 estimate recombination simultaneously with genotype imputation. This allowed us to use data  
69 from a pig breeding programme, where variable density genotype data has been gathered for  
70 genomic selection.

71

72 Our results confirmed known features of the pig recombination landscape, including  
73 differences in chromosome length, and marked sex difference. The recombination landscape  
74 was repeatable between lines, but at the same time, the lines showed differences in average  
75 genome-wide recombination rate. The heritability of genome-wide recombination was low  
76 but non-zero. We found three genomic regions associated with recombination rate, one of  
77 them harbouring the *RNF212* gene, previously associated with recombination rate in several  
78 other species.

## 79 Methods

80

81 We estimated the recombination rate landscape in nine lines of pigs from a commercial  
82 breeding programme. We performed six analyses:

- 83 (1) We estimated the average number of recombinations on each chromosome (the  
84 genetic length of chromosomes), and analysed between-sex and between-line  
85 differences in genetic length. We compared these estimates to previously published  
86 estimates.
- 87 (2) We estimated the distribution of recombinations along chromosomes (recombination  
88 rate landscapes), and analysed between-line and between-sex differences.
- 89 (3) We estimated the correlation between recombination rate and DNA sequence features  
90 previously known to correlate with recombination rate.
- 91 (4) We estimated pedigree heritability and genomic heritability of recombination rate.
- 92 (5) We ran a genome-wide association study to detect markers associated with  
93 recombination rate.
- 94 (6) We ran a simulation to test the performance of the method.

95

96 Data

97

98 We used SNP chip genotype data from nine lines of pigs from the Pig Improvement  
99 Company (PIC) breeding programme. This programme contains a diverse collection of  
100 genetics, which represent broadly used populations, including animals of Large White,  
101 Landrace, Duroc, Hampshire and Pietrain heritage. The pigs were genotyped at a mix of  
102 densities; either at low density (15K markers) using GGP-Porcine LD BeadChips (GeneSeek,  
103 Lincoln, NE) or at high density (60K or 75K markers) using GGP-Porcine HD BeadChips  
104 (GeneSeek, Lincoln, NE). In total, genotype data was available on 390,758 pigs.

105

106 Recombination rate estimation using multilocus iterative peeling

107

108 We used multilocus iterative peeling to estimate the number and location of the  
109 recombination events in each individual [23, 24]. Multilocus iterative peeling uses pedigree  
110 data to calculate the phased genotype of each individual as a combination of information  
111 from the individual's own genetic data, and that of their parents (anterior probabilities) and  
112 offspring (posterior probabilities) [25]. Multilocus iterative peeling builds on previous  
113 peeling algorithms by tracking which parental haplotype an individual inherits at each locus  
114 (segregation probabilities). This information can be used to determine which allele an  
115 individual inherits, particularly from parents who are heterozygous for that allele.

116

117 The segregation probabilities can be used to determine the number and location of likely  
118 recombination events. When a recombination happens, the offspring will inherit from a  
119 different parental haplotype. This will cause one, or both of the segregation probabilities to  
120 change, i.e. the segregation probability will change from a value close to 0 (likely to inherit  
121 the maternal haplotype) to 1 (likely to inherit the paternal haplotype). By analysing the joint  
122 distribution of neighbouring segregation probabilities, we are able to calculate the expected  
123 number of recombinations between two loci, and the expected number of recombinations  
124 across an entire chromosome.

125

126 To aid recombination rate estimation, we introduced two simplifications to the multilocus  
127 peeling method:

- 128 1. The segregation probabilities and the anterior probabilities were calculated separately  
129 for each parent in lieu of modelling their full joint distribution.
- 130 2. The segregation and genotype probabilities of the offspring were called when  
131 estimating the posterior term for each parent.

132  
133 These simplifications were introduced to reduce runtime and memory requirements. In  
134 particular, by calling the segregation and genotype values, we are able to store many of the  
135 calculations in lookup tables instead of re-computing them for each locus, and each  
136 individual. In addition, the calling of segregation values reduced the chance that feedback  
137 loops occurred between offspring with fractional segregation values at multiple nearby loci.

138  
139 A calling threshold of 0.99 was used for the segregation probabilities, and a calling threshold  
140 of 0.9 was used for the genotype probabilities. Segregation probabilities that did not reach the  
141 threshold were set to missing (equally likely to inherit either parental haplotype). Genotype  
142 probabilities that did not meet the threshold were also set to missing (all genotype states  
143 equally likely).

144  
145 The joint distribution of segregation values depends on the chromosome length (in cM). To  
146 estimate chromosome length, we initialized the length to 100cM (on average 1 recombination  
147 per chromosome), and then refined this estimate in a series of steps. At each step we  
148 calculated the expected number of recombination for each individual at each locus, and set  
149 the chromosome length based on the average population recombination rate. This step was  
150 repeated four times. Preliminary simulations found that chromosome length estimates  
151 converged after four iterations, and that the recombination estimates for target individuals  
152 were insensitive to the assumed chromosome length.

153  
154 Filtering of individuals

155  
156 After recombination estimation, we filtered the data by removing individuals without  
157 genotyped parents and grandparents in order to focus on those with high-quality  
158 recombination estimates. Filtering reduced the number of pigs to 145,763. Table 1 shows the  
159 resulting number of individuals per line post-filtering, and the total number of dams and sires  
160 for those individuals.

161

162 *Table 1. Number of individuals that passed filtering in each line, and the unique number of*  
163 *their dams and sires. By necessity, we inferred recombination rates from an equal number of*  
164 *maternal and paternal chromosomes, but they derive from a much larger number of dams*  
165 *than sires.*

| Line | Individuals kept | Dams | Sires |
|------|------------------|------|-------|
| 1    | 23273            | 2651 | 437   |
| 2    | 16661            | 2255 | 368   |
| 3    | 14278            | 2169 | 215   |
| 4    | 7153             | 1239 | 163   |
| 5    | 33566            | 4349 | 293   |
| 6    | 11666            | 1971 | 162   |
| 7    | 263              | 76   | 20    |
| 8    | 4177             | 727  | 78    |
| 9    | 34726            | 5171 | 492   |

166

167

168 Comparison between lines and to published maps

169

170 To compare the recombination landscapes of the nine lines we calculated pairwise  
171 correlations between lines of the estimated recombination rates at each marker interval,  
172 within each sex. To compare the recombination landscapes of the sexes, we calculated the  
173 correlation between sexes within each line.

174

175 We compared map length between lines using a linear model, fitting the number of  
176 recombinations observed on a chromosome as response, and fixed effects for each line and  
177 chromosome.

178

179 To compare the estimated landscapes to published landscapes, we also compared our results  
180 to the results of [1] by plotting our map length of each chromosome against published map  
181 lengths.

182

183 Correlation with genome features

184

185 To investigate the relationship between local recombination rate and genomic features, we  
186 divided the autosomal part of the Sscrofa11.1 genome [26] into 2272 windows of 1 Mbp. We

187 used Biostrings version 2.52.0 in the R statistical environment to estimate three features of  
188 sequence composition:

- 189 • fraction of guanine and cytosine bases (GC content);
- 190 • the PDRM9 consensus motif CCNCCNTNNCCNC [27];
- 191 • the CCCCACCCC motif, which was the most strongly associated with recombination  
192 in the pig in [1].

193

194 We used repeat data from RepeatMasker (<http://www.repeatmasker.org>) [28] from the pig  
195 genome to estimate the density of repeats in the same windows. We subdivided the total  
196 content of repeats into three broad categories:

- 197 • Fraction of LTR elements
- 198 • Fraction of DNA repeats elements
- 199 • Fraction of low complexity repeats

200

201 We calculated the correlation between the recombination rate and the sequence features  
202 within each window.

203

204 To find putative pericentromeric regions, we used the inferred centromere positions from  
205 [26]. On chromosomes 8, 11 and 15, where there were more than one inferred location far  
206 apart, we picked the most likely location based on karyotypes from [29].

207

208 Heritability of genome-wide recombination rate

209

210 We estimated the narrow-sense heritability of genome-wide recombination rate using animal  
211 models in MCMCglmm [30] version 2.29. We estimated the heritability of recombination  
212 using genome-wide recombination rates per megabasepair. We fitted a pedigree animal  
213 model with an additive genetic effect and a permanent environmental effect for each parent  
214 as random effects. Because we measured recombination rate in parents of genotyped  
215 offspring, who have varying numbers of offspring (see Table 1), we used a model with  
216 repeated records and a permanent environmental effect for each parent. We analysed sexes  
217 and lines separately. We used parameter expanded priors [31] for the individual variance  
218 component and for the additive genetic variance component, using  $V = 1$ ,  $v = 1$ ,  $\alpha_{\mu} = 0$ ,  $\alpha_v =$   
219 1000, which corresponds to a half-Cauchy prior with scale 100, and an inverse-Wishart prior

220 ( $V = 1, v = 1$ ) for the residual variance. Because of the low number of dams and sires, we  
221 excluded the smallest line (line 7) from the quantitative genetic analysis. We also excluded  
222 parents with an extremely high average recombination rate ( $> 5$  cM/Mbp).

223

224 Genome-wide association

225

226 We performed genome-wide association studies of genome-wide recombination rates using  
227 hierarchical linear mixed models in RepeatABEL [32] version 1.1. The linear mixed model  
228 uses a genomic relationship matrix to account for relatedness while including a random  
229 permanent environmental effect for each parent. We analysed sexes and lines separately. We  
230 used imputed best-guess genotypes from the same run of AlphaPeel. Because of the low  
231 number of dams and sires, we again excluded line 7 from the analysis, and parents with  
232 average recombination rate  $> 5$  cM/Mbp. We report significant markers below a conventional  
233 threshold of  $p < 5 \cdot 10^{-8}$ . We used the most significant marker in each region to report  
234 variance explained and the frequency of the allele associated with higher recombination.  
235 When there were more than one marker with the same p-value, we selected the marker  
236 closest to the middle of the interval.

237

238 Simulations

239

240 To demonstrate that the method works, we tested it on a synthetic dataset with features  
241 similar to real data. We simulated genotype data with AlphaSimR 0.10.0. We simulated one  
242 chromosome, using the same pedigree and same number of genotyped markers as the largest  
243 line. The simulated recombination landscape had a constant recombination rate in the middle  
244 of the chromosome, and two regions of high recombination rate at the ends, described by  
245 second degree polynomials (the figure shows the resulting true recombination rate). We  
246 assessed accuracy of the inferred recombination landscape by calculating the correlation  
247 between the estimated number of recombination at each marker interval and the true number  
248 of recombination. We also calculated the correlation between the estimated number of  
249 recombinations and a smoothed recombination landscape, using a window of 50 markers.

250

251



## 252 Results

253

254 Our results showed that:

- 255 (1) There was variation in the genetic length of chromosomes between sexes and lines.
- 256 (2) The recombination rate landscape was similar between lines but different between  
257 sexes.
- 258 (3) We confirmed previous findings that local recombination rate is correlated with GC  
259 content, repeat content, the CCCACCCC sequence motif, but not the previously  
260 described correlation with the PRDM9 consensus motif.
- 261 (4) The heritability of recombination rate was on average 0.07 for females and 0.05 for  
262 males.
- 263 (5) Three regions of the genome were associated with recombination rate, one of them  
264 containing the candidate gene *RNF212*.
- 265 (6) In simulation, we found that multilocus iterative peeling could estimate the number of  
266 recombinations per individual with an accuracy of 0.7 for dams and 0.5 for sires, and  
267 the average recombination landscape along a chromosome, but with a tendency to  
268 overestimate the genetic length.

269

270 Variation in genetic map length between lines and sexes

271

272 The genetic length of chromosomes was different between lines and sexes. Figure 1 shows  
273 the estimated map length of each chromosome, along with previously published estimates  
274 [1]. Table 2 gives the estimated of total map length in each sex and line, with confidence  
275 intervals derived from a linear model. On average, we estimated a sex-averaged map of 21.5  
276 Morgan (0.95 cM/Mbp), a female map of 23.6 Morgan (1.04 cM/Mbp), and a male map of  
277 19.5 Morgan (0.86 cM/Mbp). Supplementary tables 1-3 contain male, female, and sex-  
278 averaged consensus maps of the pig recombination landscape.

279

280 Our estimated genetic lengths of chromosomes were comparable to previous estimates, but  
281 tended to be higher. We found that females have higher recombination rate, except on  
282 chromosome 1, where male recombination rate was higher, and chromosome 13, where the  
283 recombination rate is similar in both sexes. This confirms previous results [1].

284 *Table 2. Estimates from linear model of total map length. Intervals are 95% confidence*  
 285 *intervals.*

| Line    | Sex         | Map length |       | Rate  |          |
|---------|-------------|------------|-------|-------|----------|
|         |             | (Morgan)   | Lower | Upper | (cM/Mbp) |
| 1       | female      | 23.6       | 23.5  | 23.6  | 1.04     |
| 1       | male        | 19.4       | 19.4  | 19.5  | 0.86     |
| 2       | female      | 24.1       | 24.1  | 24.2  | 1.06     |
| 2       | male        | 20.0       | 20.0  | 20.0  | 0.88     |
| 3       | female      | 22.3       | 22.2  | 22.3  | 0.98     |
| 3       | male        | 18.2       | 18.1  | 18.2  | 0.80     |
| 4       | female      | 23.5       | 23.4  | 23.5  | 1.04     |
| 4       | male        | 19.3       | 19.3  | 19.4  | 0.85     |
| 5       | female      | 22.8       | 22.7  | 22.8  | 1.01     |
| 5       | male        | 18.7       | 18.6  | 18.7  | 0.82     |
| 6       | female      | 23.7       | 23.6  | 23.7  | 1.04     |
| 6       | male        | 19.5       | 19.5  | 19.6  | 0.86     |
| 7       | female      | 25.9       | 25.5  | 26.2  | 1.14     |
| 7       | male        | 21.7       | 21.4  | 22.1  | 0.96     |
| 8       | female      | 24.1       | 24.0  | 24.2  | 1.06     |
| 8       | male        | 20.0       | 19.9  | 20.1  | 0.88     |
| 9       | female      | 22.6       | 22.6  | 22.6  | 1.00     |
| 9       | male        | 18.5       | 18.4  | 18.5  | 0.82     |
| Average | female      | 23.6       |       |       | 1.04     |
|         | male        | 19.5       |       |       | 0.86     |
|         | sex-average | 21.5       |       |       | 0.95     |

286

287

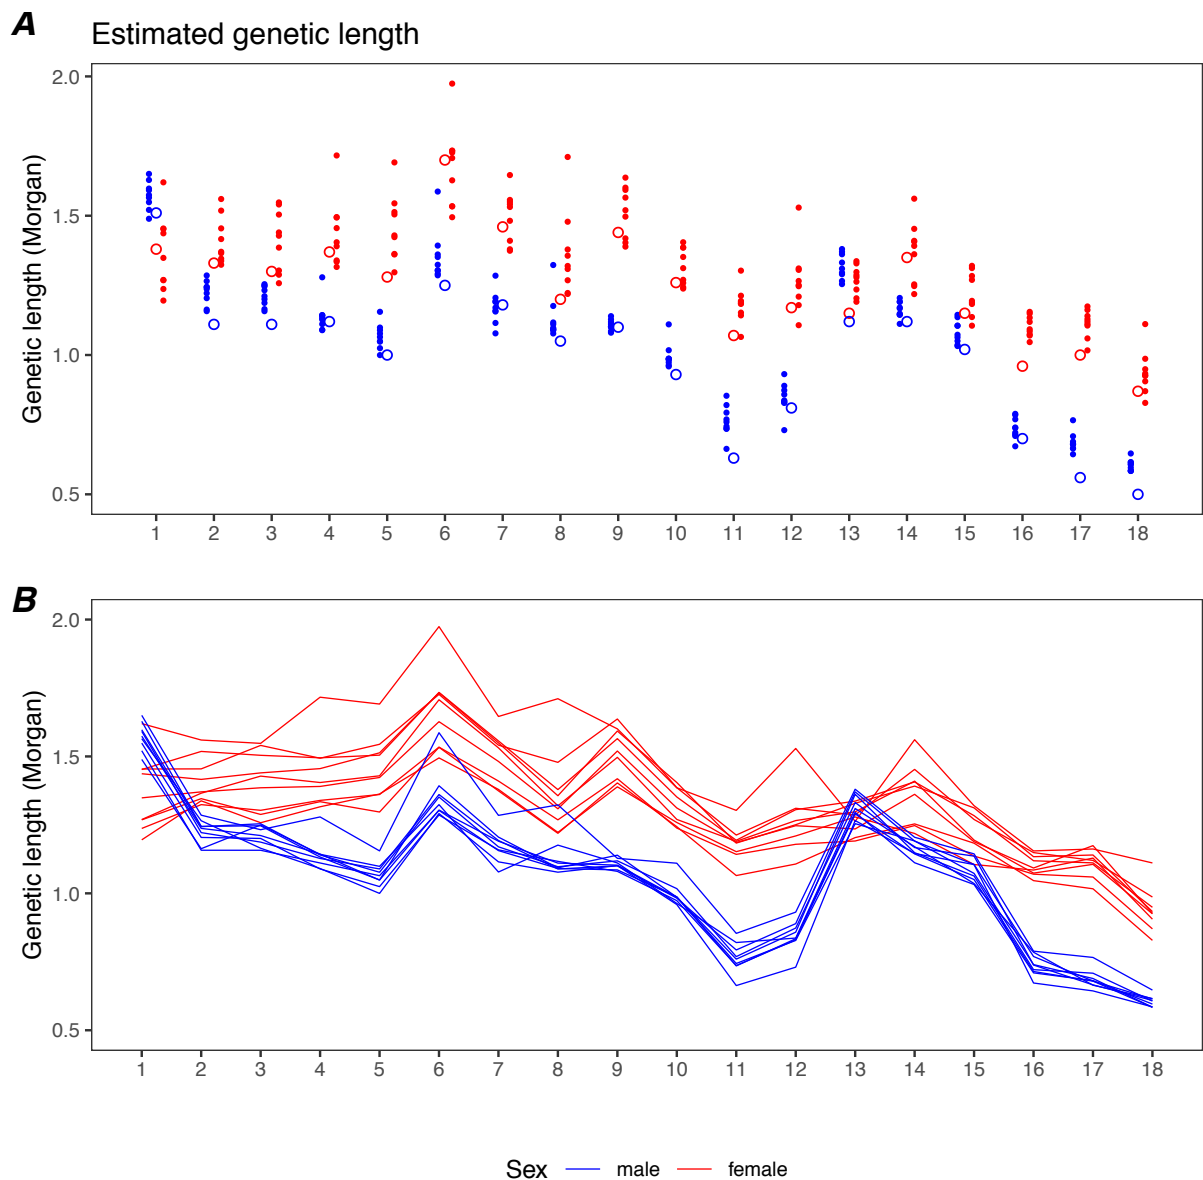

288

289 *Figure 1. Genetic length of each pig autosome, as estimated by multilocus iterative peeling.*

290 *The horizontal axis corresponds to chromosomes 1-18. Red dots and lines show female*

291 *estimates, while blue dots and lines show male estimates. Panel A compares estimates from*

292 *multilocus iterative peeling (filled dots) to estimates from [1] (open circles). Panel B shows*

293 *estimates from the same line of pigs connected by lines.*

294 Difference in recombination landscape between sexes

295

296 The shape of the recombination landscape was similar between lines but different between  
297 sexes. Figure 2 presents the recombination rate landscape for each chromosome, and Figure 3  
298 shows the correlation between the per-marker interval recombination rate estimates, between  
299 lines and between sexes. Both sexes had higher recombination rate near chromosome ends  
300 and lower recombination rate in the middle of the chromosomes. However, there were several  
301 broad regions of elevated female recombination rate which was not present in the males.  
302 These regions were repeatable between lines. The mean between-line correlation was 0.83 in  
303 females and 0.70 in males, whereas the mean correlation between sexes was 0.40 across  
304 lines.

305

306 Correlation between genomic features and recombination rate

307

308 Local recombination rate had moderate to low correlation (absolute correlation coefficients  
309 less than 0.33) with GC content, repeats and particular sequence motifs. Figure 4 shows the  
310 correlations between recombination rate and genomic features in 1 Mbp windows, separated  
311 by sex. There were positive correlations with GC content, and negative correlation with  
312 sequence repeats when all repeat classes were combined. The correlation between  
313 recombination rate and different types of repeats was variable. Recombination rate was only  
314 weakly correlated with counts of the PRDM9 consensus motif CCNCCNTNNCCNC, but  
315 moderately correlated with counts of the CCCCACCCC motif, previously found to be  
316 enriched in high recombination regions in the pig genome [1].

## Recombination landscape

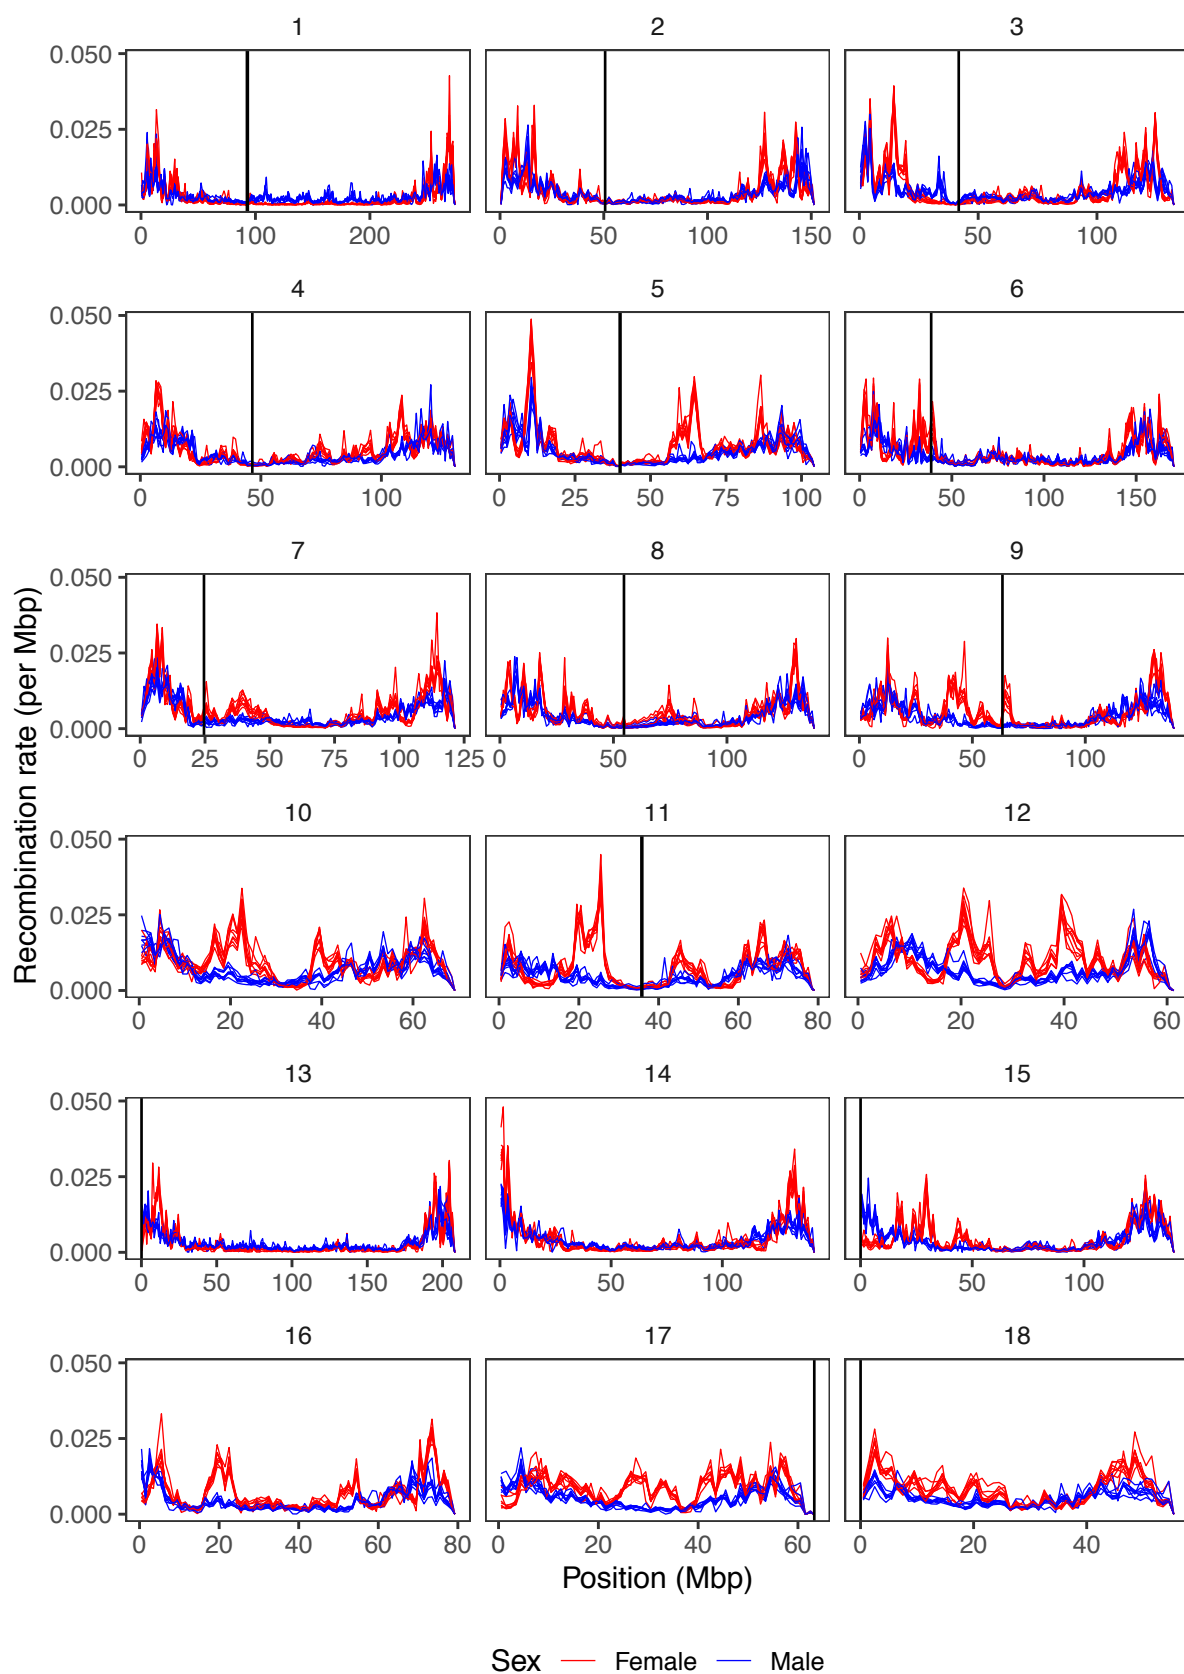

318 *Figure 2. Recombination landscape in the pig. The lines show recombination rate in windows*  
 319 *of 1 Mbp along the pig genome (Sscrofa11.1). Red lines show female estimates and blue lines*  
 320 *show male estimates. Each line shows one of the nine breeding lines. The black vertical lines*  
 321 *are predicted centromere locations in the reference genome, for chromosomes where they are*  
 322 *available.*  
 323  
 324  
 325

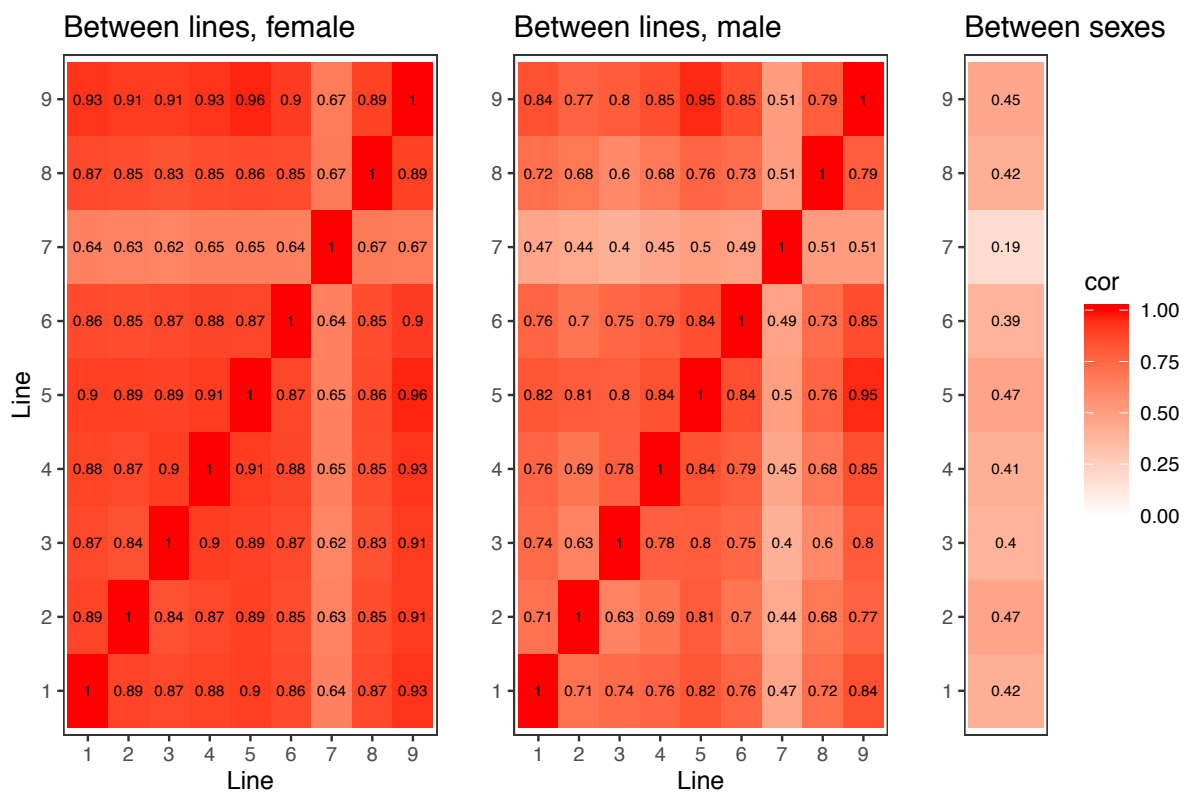

326  
 327 *Figure 3. Correlation heatmap of recombination landscapes between lines and sexes.*  
 328 *Heatmaps show pairwise correlations between lines of the estimated recombination rates at*  
 329 *each marker interval, within each sex, and the correlation between sexes within each line.*  
 330

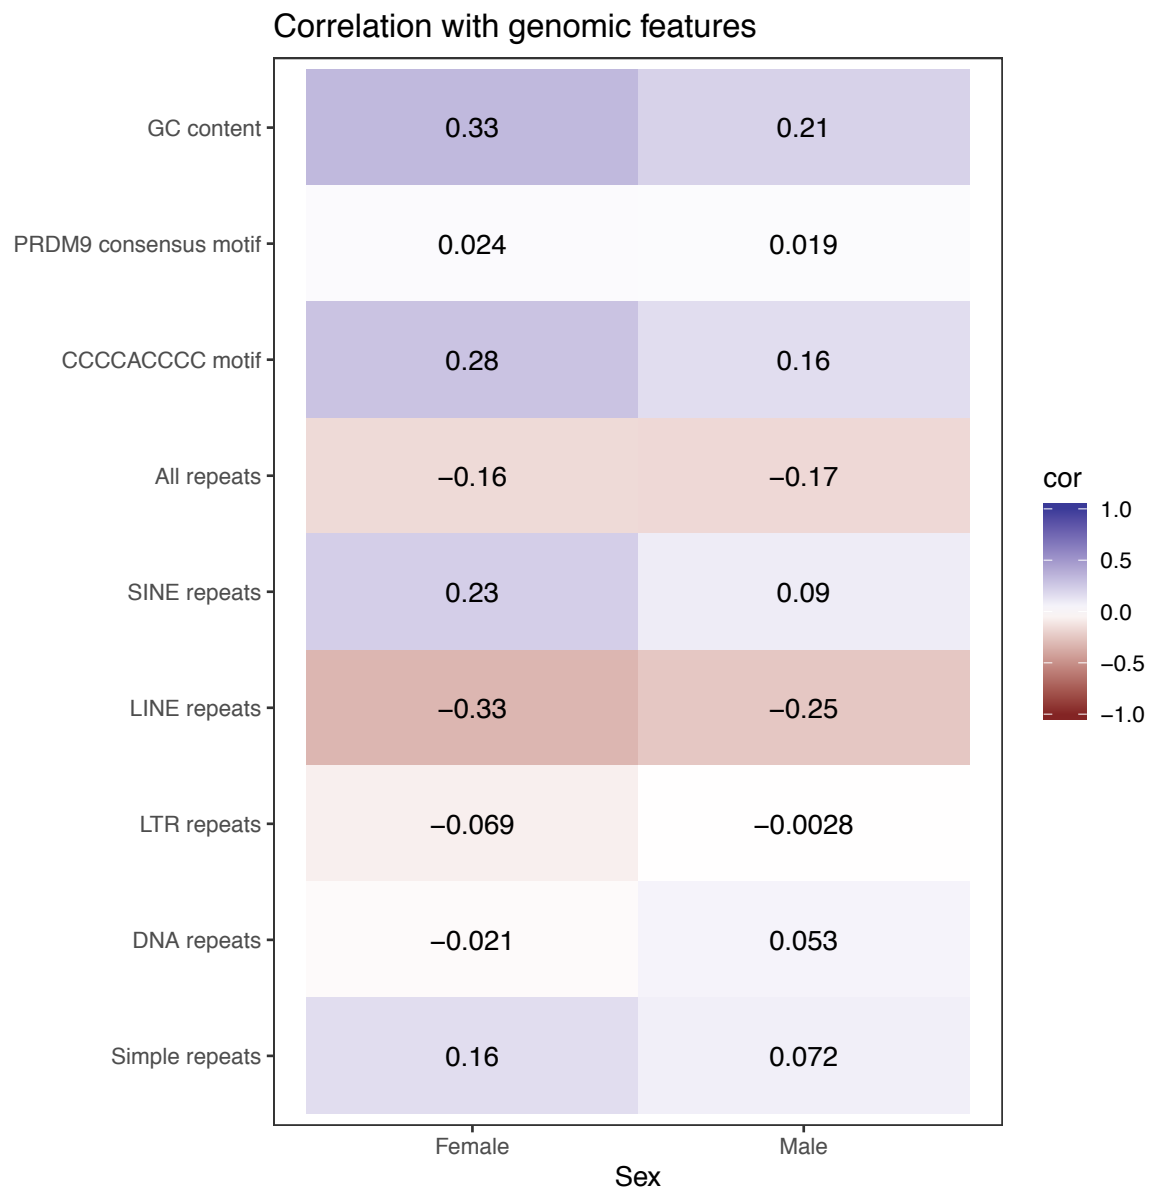

331

332 *Figure 4. Heatmap of correlation between genome features and recombination rate in*  
333 *windows of 1 Mbp. The heatmap shows correlation between recombination rate sequence*  
334 *features within 2272 windows of the autosomal part of the pig genome (Sscrofa11.1).*

335 Heritability of recombination rate

336

337 Genome-wide recombination rate had low but nonzero heritability ( $h^2$  on average 0.07 for  
338 females and 0.05 for males). Figure 5 shows the heritability and ratio of permanent  
339 environmental variance, broken down by sex and line. There was little evidence of  
340 differences in heritability between lines. The open circles in Figure 5 show genomic  
341 heritability estimates from genome-wide association analyses. The genomic heritabilities  
342 suggest that the SNP chip captured most (on average 83%) of the additive genetic variance in  
343 recombination.

344

345 Genome-wide association of recombination rate

346

347 Genome-wide association revealed three regions of the genome containing markers  
348 associated with genome-wide recombination rate. Figure 6 shows the results of genome-wide  
349 association scans within each line, broken down by sex. Table 3 shows the location of the  
350 most significant marker for each region with variance explained and allele frequency. There  
351 was a region associated with female recombination rate at the start of chromosome 8 in six of  
352 the lines, as well as a region on chromosome 17 in line 1, and one on chromosome 1 in line 6.  
353 The chromosome 8 region was also associated with male recombination rate in two lines.  
354 Figure 7 shows a zoomed-in view of each of these regions, with the location of known  
355 candidate genes involved in recombination.



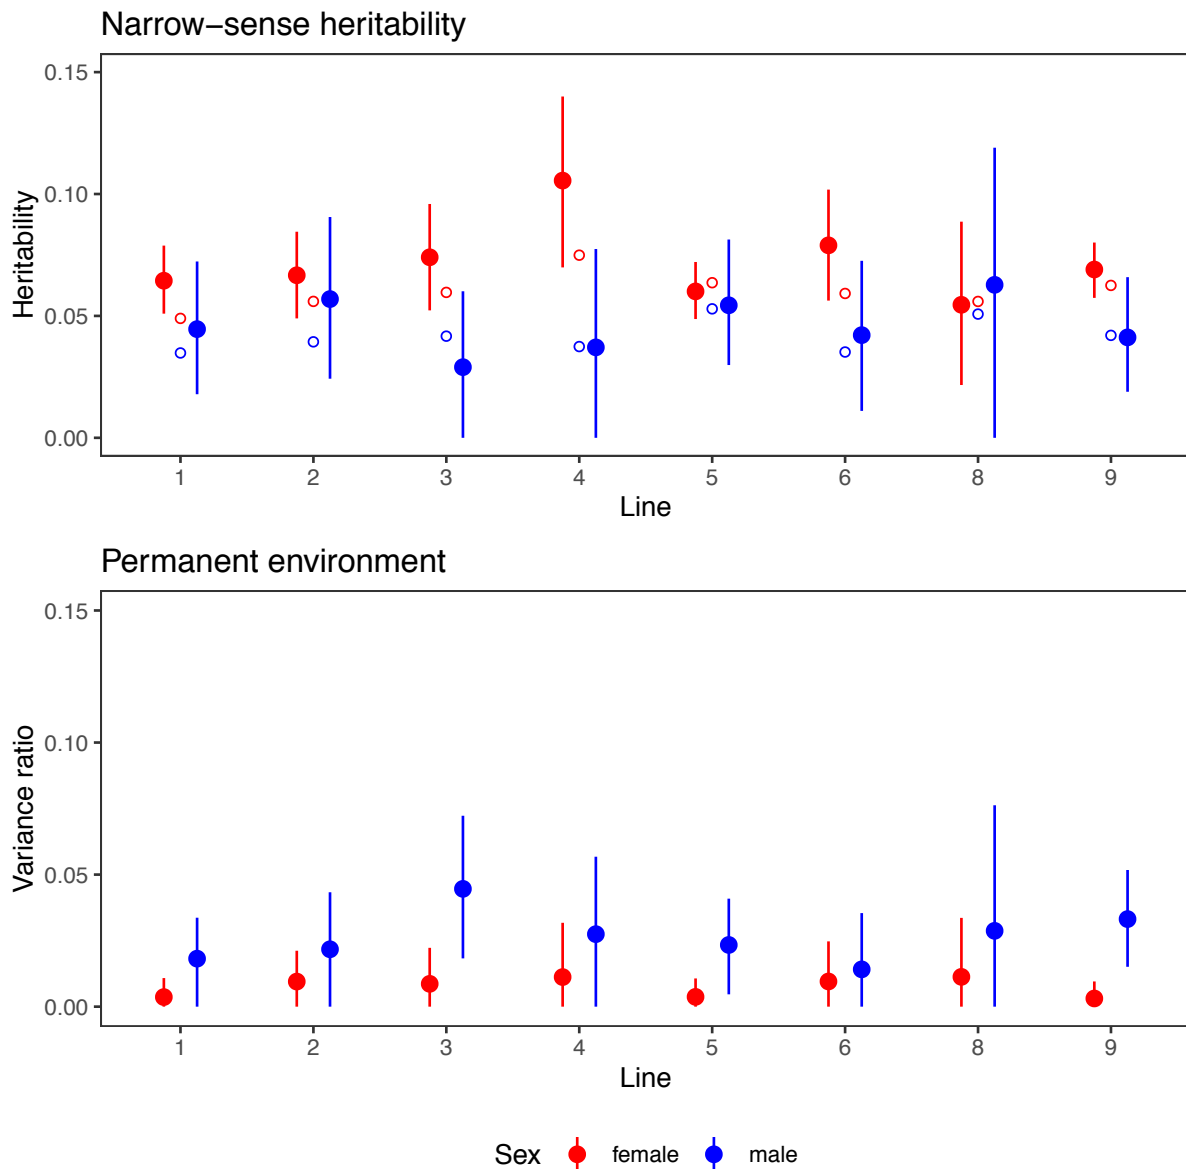

356

357 *Figure 5. Heritability of average recombination. The dots show estimates of narrow-sense*  
358 *heritability and the permanent environmental effect for average genome-wide recombination*  
359 *estimated with an animal model. The lines show 95% credible intervals. Red dots and lines*  
360 *show female estimates, while blue dots and lines show male estimates. Open circles show the*  
361 *genomic heritability estimated from genome-wide association. Because of the low number of*  
362 *dams and sires, we excluded the smallest line (line 7) from the analysis.*

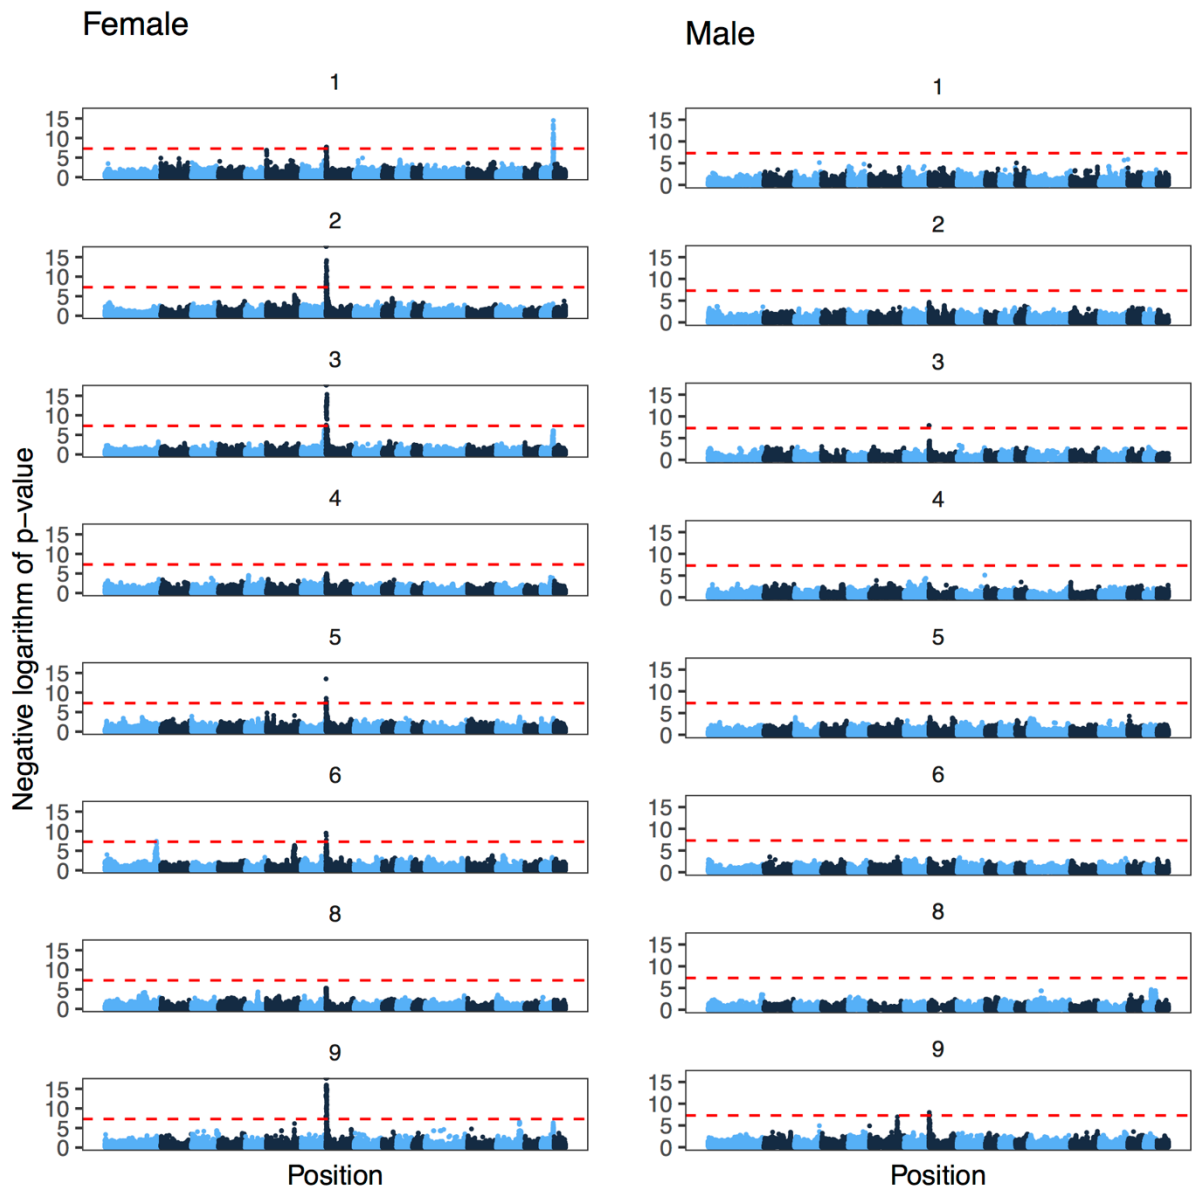

363

364 *Figure 6. Genome-wide association of average recombination. The subplots are Manhattan*  
365 *plots of the negative logarithm of the p-value of association against genomic position, broken*  
366 *down by line and sex. Alternating colours correspond to chromosomes 1-18. Because of the*  
367 *low number of dams and sires, we excluded the smallest line (line 7) from the analysis. The*  
368 *dashed red line shows a conventional genome-wide significance threshold of  $5 \cdot 10^{-8}$ .*

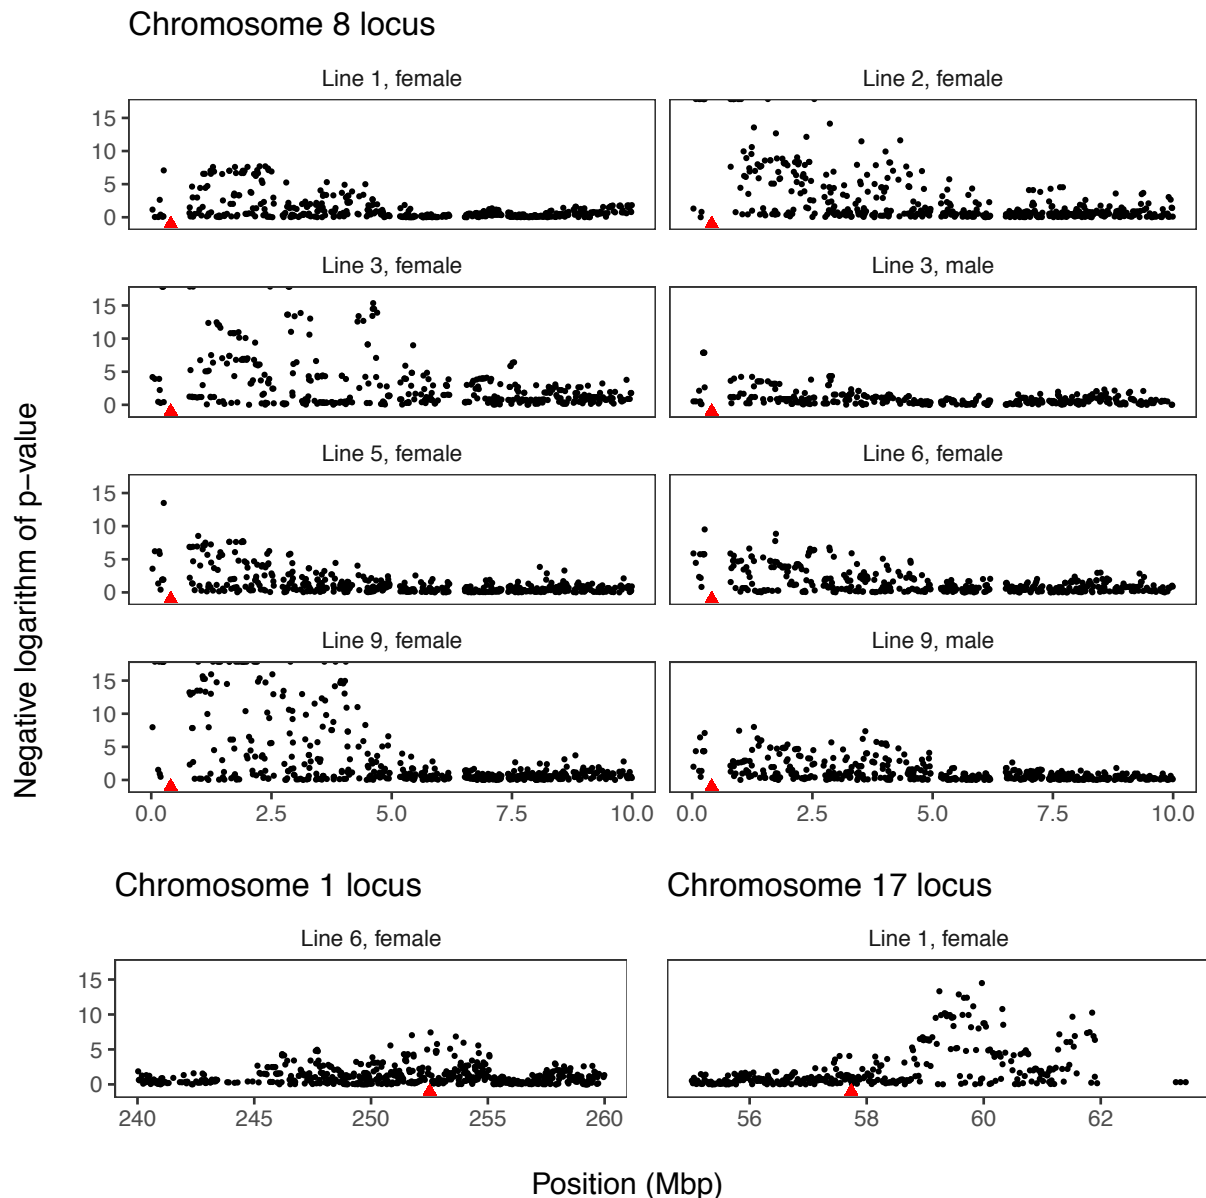

369

370 *Figure 7. Regions associated with recombination rate and location of recombination-*  
371 *associated candidate genes. The subplots are Manhattan plots of the negative logarithm of*  
372 *the p-value of association against genomic position, zoomed in to show the region around the*  
373 *significant markers. The red triangles show location of RNF212 on chromosome 8, SLOC1*  
374 *on chromosome 1, and SPO11 on chromosome 17.*

375 *Table 3. Genome-wide association study hits for average recombination, with position of the*  
376 *lead SNP, additive genetic variance explained by the locus, and allele frequency of the allele*  
377 *associated with higher recombination rate.*

378

| Chromosome | Sex    | Line | Lead SNP position | Genetic variance explained | Allele frequency |
|------------|--------|------|-------------------|----------------------------|------------------|
| 1          | female | 6    | 252,547,401       | 0.10                       | 0.57             |
| 8          | female | 1    | 2,253,270         | 0.08                       | 0.90             |
| 8          | female | 2    | 75,256            | 0.60                       | 0.53             |
| 8          | female | 3    | 226,298           | 0.41                       | 0.70             |
| 8          | male   | 3    | 226,298           | 0.44                       | 0.74             |
| 8          | female | 5    | 259,617           | 0.07                       | 0.27             |
| 8          | female | 6    | 259,617           | 0.12                       | 0.74             |
| 8          | female | 9    | 75,256            | 0.14                       | 0.12             |
| 8          | male   | 9    | 1,283,621         | 0.22                       | 0.41             |
| 17         | female | 1    | 59,968,884        | 0.16                       | 0.78             |

379

380 Algorithm performance on synthetic data

381

382 We tested the accuracy of the estimated recombination by analysing a synthetic dataset.

383 Figure 8 shows the simulated and estimated map length, recombination landscape, and a

384 scatterplot of simulated and estimated numbers of recombinations per individual. Our method

385 slightly overestimated recombination rate when there was variable recombination along the

386 chromosome. Because of uncertainty in the location of recombinations, the estimated

387 recombination landscape did not track per-marker recombination rate variation very well ( $r =$

388 0.59), but better captured the smoothed recombination landscape using a window of 50

389 markers ( $r = 0.86$ ). The accuracy of individual-level estimates of recombination was higher

390 for dams ( $r = 0.72$ ) than for sires ( $r = 0.55$ ).

391

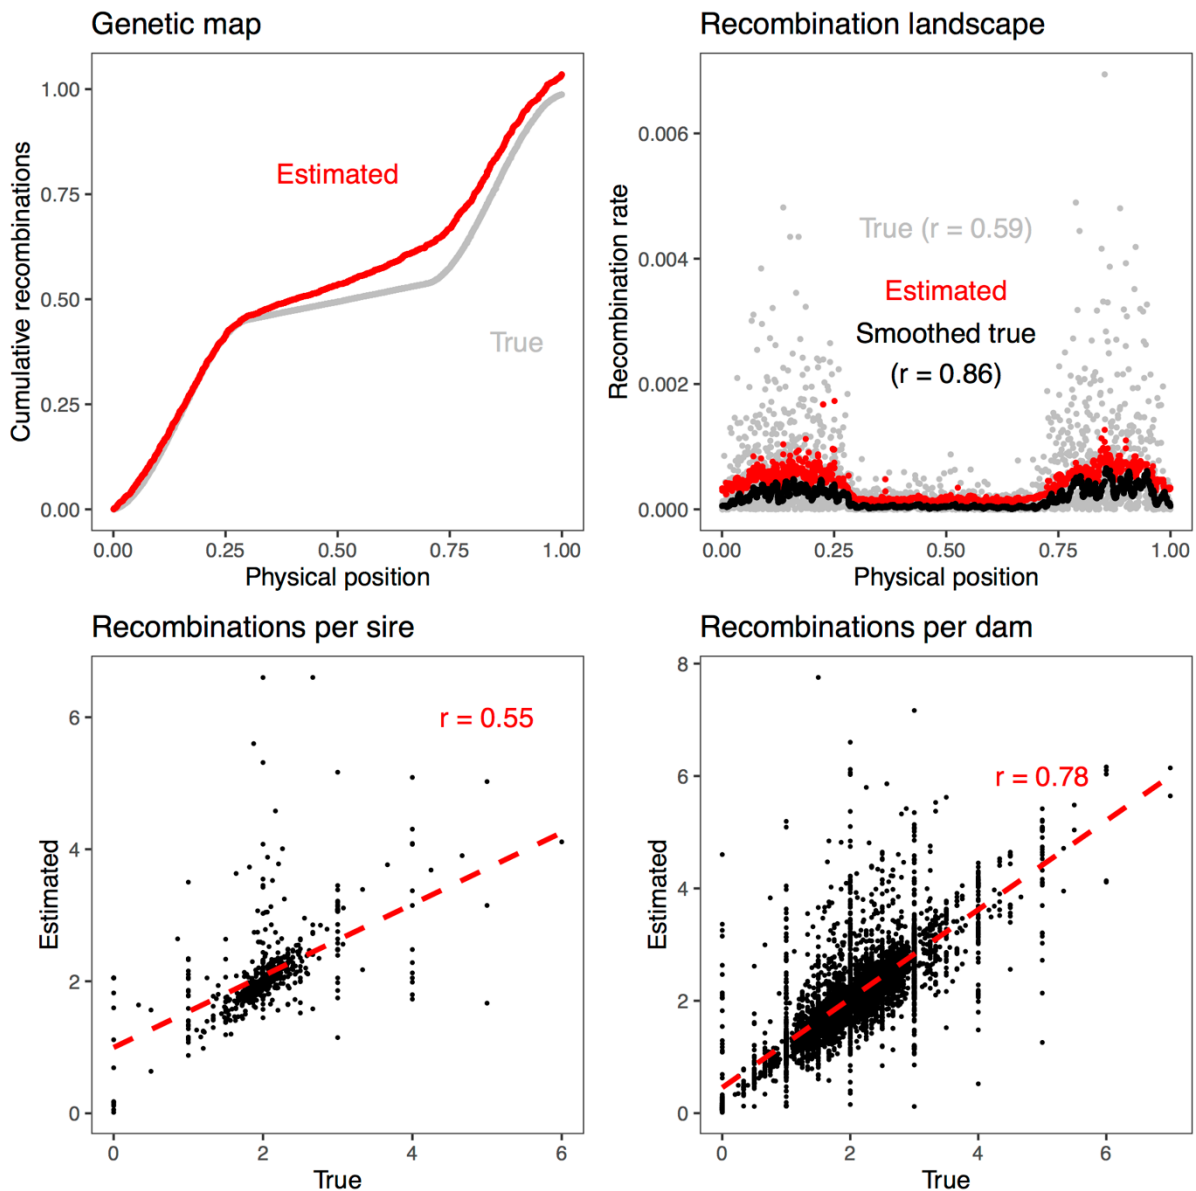

392

393 *Figure 8. Recombination rate estimation on simulated data. Cumulative number of*  
394 *recombinations, recombination landscape along the simulated chromosome and the*  
395 *correlation between true and estimated numbers of recombination in sires and dams. The*  
396 *smoothed values are rolling averages of 50 markers. The red dashed line is the regression*  
397 *line between true and estimated values.*

## 398 Discussion

399

400 In this paper, we estimated recombination rate variation within the genome and between  
401 individuals in the pig using multiocus iterative peeling in nine genotyped pedigrees.

402

403 In this section, we discuss three main results:

404 (1) We confirm the known features of the pig recombination landscape, but not the  
405 previously described correlation with the PRDM9 consensus motif.

406 (2) We show that recombination rate in the pig is genetically variable and associated with  
407 alleles at the *RNF212* gene.

408 (3) Multilocus iterative peeling is a compelling method for estimating recombination  
409 landscapes from large genotyped pedigrees, but tends to overestimate genetic map  
410 length.

411

412 Features of the pig recombination landscape

413

414 Our results recover known features of recombination in the pig, including the relative  
415 chromosome lengths, and the marked sexual dimorphism. There are two notable exceptions,  
416 where our estimates disagreed with previous results: we estimate overall longer genetic  
417 lengths of chromosomes, and the correlations between recombination rate, density of the  
418 PRDM9 consensus binding motif, and the density of some repeat classes are different than  
419 estimated previously.

420

421 We estimated longer genetic maps than previous estimates for the pig. The total genetic map  
422 lengths ranged from 18.5 to 21.7 Morgan for males and 22.3 to 25.9 Morgan for females. In  
423 comparison, [1] found sex-specific map lengths of 17.8 and 17.5 Morgan for males, and 22.4  
424 and 25.5 Morgan for females. This may be due to overestimation (see below), but also a  
425 higher marker density and more complete use of the pedigree allowing us to detect more  
426 recombinations.

427

428 The correlation between recombination and density of the PRDM9 consensus binding motif,  
429 was lower than previous estimates. Because the PRDM9 protein determines the locations of a  
430 subset of recombination hotspots, a positive correlation was expected. We detected only a

431 weak positive correlation with PRDM9 consensus motif density and recombination, which  
432 suggests that we lack the genomic resolution to detect variation at this scale. The  
433 recombination rate landscape is the outcome of processes operating at a much smaller scale,  
434 with hotspots of a few kilobasepairs (as estimated by population sequencing [3] or by high-  
435 density gamete genotyping [33]). There is more subtle local variation in recombination rate  
436 that we cannot detect.

437

438 The associations between recombination and transposable element density were mixed, and  
439 different for different types of transposable elements. The overall correlation between  
440 recombination rate and repeats was negative, in line with estimates from other species [34].  
441 The negative correlation with LINEs was stronger than previously reported and the positive  
442 correlation with simple repeats was weaker. One reason for these differences might be that  
443 we used the more complete Sscrofa11.1 reference genome [26], which likely better resolves  
444 the repeat landscape of the pig genome than the previous version.

445

446

447 Genetic variation in genome-wide recombination rate

448

449 Our results from the pig agree with the general picture of recombination rate variation in  
450 vertebrates. The chromosome 8 locus is homologous to regions identified in humans [35–37],  
451 cattle [7, 8, 10], sheep [12, 13], and chickens [14]. It contains the *RNF212* gene, a paralog of  
452 which is also associated with recombination in deer [11]. The RNF212 protein binds to  
453 recombination complexes, and is essential for crossover formation [38].

454

455 While *RNF212* is an obvious candidate gene, it is harder to find candidates for the other two  
456 regions. We searched for the locations of candidate regions from other vertebrates, and  
457 rapidly evolving recombination genes in mammals [39]. The chromosome 1 locus overlaps  
458 *SHOC1*, one of the rapidly evolving recombination genes in mammals [39]. The closest  
459 candidate recombination gene from the chromosome 17 locus is *SPO11*, associated with  
460 recombination in chickens [14]. However, it is about two megabasepairs away from the most  
461 significant marker.

462

463 There are differences in recombination rate between lines, which may be due to fixed genetic  
464 differences. Given that livestock populations have relatively small effective population sizes,  
465 and assuming that recombination rate variation has a rather simple genetic architecture, line  
466 differences in recombination rate might very well be due to genetic differences that have  
467 fixed by chance. At the same times, all the lines showed evidence of comparable genetic  
468 variation in recombination rate, and there was evidence that the major locus on chromosome  
469 8 segregates in most lines.

470

471 A higher recombination rate could be beneficial for breeding, because it would reduce  
472 linkage disequilibrium between causative variants and release genetic variance. Simulations  
473 suggest that substantial increases in genome-wide recombination rate could increase genetic  
474 gain [40]. We can approximate how much breeding could increase recombination rate based  
475 on our results.

476

477 First, we can use the Breeder's equation to predict the response to selection, treating genome-  
478 wide recombination as a quantitative trait. The response is the heritability multiplied by the  
479 selection differential  $S$ , which is the difference between population mean  $\mu$  and mean of the  
480 selected individuals  $\mu_{selected}$ .

481

$$482 \quad R = h^2 S = h^2 (\mu_{selected} - \mu)$$

483

484 Using distribution of genome-wide recombination rates from the males of the largest line, the  
485 mean were 0.904 cM/Mbp. If we were to select the 10%, 20% or 30% highest recombination  
486 individuals, the mean of the selected individuals would be 1.22 cM/Mbp, 1.15 cM/Mbp, and  
487 1.11 cM/Mbp respectively. Assuming a heritability of 0.05, comparable to our estimated  
488 genomic heritability, this would result in responses of:

489

$$490 \quad R_{10\%} = 0.05 \cdot (1.22 - 0.904) = 0.016 \text{ cM/Mbp}$$

491

$$R_{20\%} = 0.012 \text{ cM/Mbp}$$

492

$$R_{30\%} = 0.010 \text{ cM/Mbp}$$

493

494 Relative to the average recombination rate, that would mean increases of 1.7%, 1.3% and  
495 1.1%, respectively.



496

497 Second, we concentrate on the major locus on chromosome 8 that we detected in most of the  
498 lines, and approximate the increase in recombination rate that could be achieved if this locus  
499 was fixed for the high recombination allele. Again, using estimates from the largest line, the  
500 additive effect  $a$  of the chromosome 8 locus was estimated to be 0.0271 cM/Mbp (averaging  
501 the male and female estimates), and the frequency  $f$  of the high recombination allele was  
502 0.332 (weighted average of males and females). The increase in the mean of the population  
503 by fixing the chromosome 8 locus would be:

504

$$505 \quad d = a(1 - f) = 0.0271 \cdot (1 - 0.332) = 0.018 \text{ cM/Mbp}$$

506

507 That is, it would increase genome-wide recombination rate by about 2%.

508

509 Compared to the simulation results of [40], which suggest that a doubling or more of  
510 genome-wide recombination rate would lead to substantial genetic gains, these results  
511 suggest that breeding for higher genome-wide recombination rate is not a practical alternative  
512 for improving genetic gain. There may be other potential avenues, such as introducing  
513 targeted recombinations in favourable locations [41] by biotechnological means.

514

515

516 Recombination rate inference by multilocus peeling

517

518 Throughout this paper we have used multilocus iterative peeling to estimate recombination  
519 rate. In our simulation study, we found that multilocus iterative peeling could estimate the  
520 number of recombinations per individual with an accuracy of 0.7 for dams and 0.5 for sires,  
521 and the average recombination landscape along a chromosome. This is consistent with our  
522 analysis of the pig genome, where we confirm previously known features of the pig  
523 recombination landscape. However, the simulation results also show that we overestimated  
524 the total genetic map length, consistent with our comparisons between the estimate  
525 recombination rate and previously published estimates [1].

526

527 Multilocus iterative peeling presents a compelling technique for estimating recombination  
528 rate in large pedigree populations: it scales well to massive livestock pedigrees (more than

529 150,000 individuals), does not require pre-phasing of the data, and handles individuals  
530 genotyped on range of platforms without requiring non-overlapping variants to be imputed  
531 beforehand.

532

533 The primary downside is that multilocus iterative peeling requires multiple generations of  
534 genotyped individuals to be available to accurately phase, impute, and estimate the  
535 recombination rate. Although this information may be available in pig or chicken breeding  
536 programmes [23, 42], and some wild populations [12] it may not be available in all  
537 populations. In addition to this the overestimation of genetic map length suggests that the  
538 exact genetic map lengths and counts of recombination for a specific individual may not be  
539 accurate, but it is able to recover broad patterns in recombination between chromosomes and  
540 between individuals.

541

## 542 Conclusion

543

544 In this paper we analyse 150,000 individuals from nine pig pedigrees. We find that we are  
545 able to recover broad-scale patterns in the total genetic map length, recombination landscape,  
546 and sex differences in recombination rates. In addition to this, we found that recombination  
547 rate had low, but non-zero heritability, and a genome-wide association study detected three  
548 regions associated with recombination rate. This paper highlights the ability to use large scale  
549 pedigree and genomic data, as is routinely collected in many closely managed populations to  
550 infer and understand recombination and recombination rate variation.

551

## 552 Declarations

553

### 554 **Ethics approval and consent to participate**

555 The samples used in this study were derived from the routine breeding activities of PIC.

### 556 **Consent for publication**

557 Not applicable.

### 558 **Availability of data and materials**

559 The datasets generated and analysed in this study are derived from the PIC breeding  
560 programme and not publicly available.

561 **Competing interests**

562 The authors declare that they have no competing interests.

563 **Funding**

564 The authors acknowledge the financial support from the BBSRC ISPG to The Roslin Institute  
565 BBS/E/D/30002275, from Grant Nos. BB/N015339/1, BB/L020467/1, BB/M009254/1, from  
566 Genus PLC, Innovate UK, and from the Swedish Research Council Formas Dnr 2016-01386.

567 **Author's contributions**

568 JMH, MJ, AW and GG conceived the study. MJ, AW, RRF and CC analysed data. WH and  
569 DdK helped interpret the results. MJ, AW and JMH wrote the paper. All authors read and  
570 approved the final manuscript.

571 **Acknowledgements**

572 This work has made use of the resources provided by the Edinburgh Compute and Data  
573 Facility (ECDF) (<http://www.ecdf.ed.ac.uk>).

574

575 **References**

576

- 577 1. Tortereau F, Servin B, Frantz L, Megens H-J, Milan D, Rohrer G, et al. A high density  
578 recombination map of the pig reveals a correlation between sex-specific recombination and  
579 GC content. *BMC genomics*. 2012;13:586.
- 580 2. McVean GA, Myers SR, Hunt S, Deloukas P, Bentley DR, Donnelly P. The fine-scale  
581 structure of recombination rate variation in the human genome. *Science*. 2004;304:581–4.
- 582 3. Myers S, Bottolo L, Freeman C, McVean G, Donnelly P. A fine-scale map of  
583 recombination rates and hotspots across the human genome. *Science*. 2005;310:321–4.
- 584 4. Kong A, Gudbjartsson DF, Sainz J, Jonsdottir GM, Gudjonsson SA, Richardsson B, et al.  
585 A high-resolution recombination map of the human genome. *Nature genetics*. 2002;31:241.
- 586 5. Fledel-Alon A, Leffler EM, Guan Y, Stephens M, Coop G, Przeworski M. Variation in  
587 human recombination rates and its genetic determinants. *PloS one*. 2011;6:e20321.
- 588 6. Kong A, Barnard J, Gudbjartsson DF, Thorleifsson G, Jonsdottir G, Sigurdardottir S, et al.  
589 Recombination rate and reproductive success in humans. *Nature genetics*. 2004;36:1203.

- 590 7. Kadri NK, Harland C, Faux P, Cambisano N, Karim L, Coppieters W, et al. Coding and  
591 noncoding variants in HFM1, MLH3, MSH4, MSH5, RNF212, and RNF212B affect  
592 recombination rate in cattle. *Genome research*. 2016;26:1323–1332.
- 593 8. Sandor C, Li W, Coppieters W, Druet T, Charlier C, Georges M. Genetic variants in  
594 REC8, RNF212, and PRDM9 influence male recombination in cattle. *PLoS genetics*.  
595 2012;8:e1002854.
- 596 9. Simianer H, Szyda J, Ramon G, Lien S. Evidence for individual and between-family  
597 variability of the recombination rate in cattle. *Mammalian genome*. 1997;8:830–835.
- 598 10. Ma L, O’Connell JR, VanRaden PM, Shen B, Padhi A, Sun C, et al. Cattle sex-specific  
599 recombination and genetic control from a large pedigree analysis. *PLoS genetics*.  
600 2015;11:e1005387.
- 601 11. Johnston SE, Huisman J, Pemberton JM. A genomic region containing REC8 and  
602 RNF212B is associated with individual recombination rate variation in a wild population of  
603 red deer (*Cervus elaphus*). *G3: Genes, Genomes, Genetics*. 2018;8:2265–76.
- 604 12. Johnston SE, Bérénos C, Slate J, Pemberton JM. Conserved genetic architecture  
605 underlying individual recombination rate variation in a wild population of Soay sheep (*Ovis*  
606 *aries*). *Genetics*. 2016;203:583–98.
- 607 13. Petit M, Astruc J-M, Sarry J, Drouilhet L, Fabre S, Moreno CR, et al. Variation in  
608 recombination rate and its genetic determinism in sheep populations. *Genetics*.  
609 2017;207:767–84.
- 610 14. Weng Z, Wolc A, Su H, Fernando RL, Dekkers JC, Arango J, et al. Identification of  
611 recombination hotspots and quantitative trait loci for recombination rate in layer chickens.  
612 *Journal of animal science and biotechnology*. 2019;10:20.
- 613 15. Dapper AL, Payseur BA. Connecting theory and data to understand recombination rate  
614 evolution. *Philosophical Transactions of the Royal Society B: Biological Sciences*.  
615 2017;372:20160469.

- 616 16. Stapley J, Feulner PG, Johnston SE, Santure AW, Smadja CM. Variation in  
617 recombination frequency and distribution across eukaryotes: patterns and processes.  
618 *Philosophical Transactions of the Royal Society B: Biological Sciences*. 2017;372:20160455.
- 619 17. Broman KW, Murray JC, Sheffield VC, White RL, Weber JL. Comprehensive human  
620 genetic maps: individual and sex-specific variation in recombination. *The American Journal*  
621 *of Human Genetics*. 1998;63:861–9.
- 622 18. Sturtevant AH. The linear arrangement of six sex-linked factors in *Drosophila*, as shown  
623 by their mode of association. *Journal of experimental zoology*. 1913;14:43–59.
- 624 19. Coop G, Wen X, Ober C, Pritchard JK, Przeworski M. High-resolution mapping of  
625 crossovers reveals extensive variation in fine-scale recombination patterns among humans.  
626 *science*. 2008;319:1395–8.
- 627 20. Weng Z-Q, Saatchi M, Schnabel RD, Taylor JF, Garrick DJ. Recombination locations  
628 and rates in beef cattle assessed from parent-offspring pairs. *Genetics Selection Evolution*.  
629 2014;46:34.
- 630 21. Segura J, Ferretti L, Ramos-Onsins S, Capilla L, Farré M, Reis F, et al. Evolution of  
631 recombination in eutherian mammals: insights into mechanisms that affect recombination  
632 rates and crossover interference. *Proceedings of the Royal Society B: Biological Sciences*.  
633 2013;280:20131945.
- 634 22. Mary N, Barasc H, Ferchaud S, Billon Y, Meslier F, Robelin D, et al. Meiotic  
635 recombination analyses of individual chromosomes in male domestic pigs (*Sus scrofa*  
636 *domestica*). *PLoS One*. 2014;9:e99123.
- 637 23. Whalen A, Ros-Freixedes R, Wilson DL, Gorjanc G, Hickey JM. Hybrid peeling for fast  
638 and accurate calling, phasing, and imputation with sequence data of any coverage in  
639 pedigrees. *Genetics Selection Evolution*. 2018;50:67.
- 640 24. Meuwissen T, Goddard M. The use of family relationships and linkage disequilibrium to  
641 impute phase and missing genotypes in up to whole-genome sequence density genotypic data.  
642 *Genetics*. 2010;185:1441–9.

- 643 25. Elston RC, Stewart J. A general model for the genetic analysis of pedigree data. *Human*  
644 *heredity*. 1971;21:523–42.
- 645 26. Warr A, Affara N, Aken B, Beiki H, Bickhart DM, Billis K, et al. An improved pig  
646 reference genome sequence to enable pig genetics and genomics research. *bioRxiv*.  
647 2019;:668921.
- 648 27. Myers S, Freeman C, Auton A, Donnelly P, McVean G. A common sequence motif  
649 associated with recombination hot spots and genome instability in humans. *Nature genetics*.  
650 2008;40:1124.
- 651 28. Bao W, Kojima KK, Kohany O. Repbase Update, a database of repetitive elements in  
652 eukaryotic genomes. *Mobile DNA*. 2015;6:11.
- 653 29. Hansen-Melander E, Melander Y. The karyotype of the pig. *Hereditas*. 1974;77:149–158.
- 654 30. Hadfield JD. MCMC methods for multi-response generalized linear mixed models: the  
655 *MCMCglmm* R package. *Journal of Statistical Software*. 2010;33:1–22.
- 656 31. Gelman A. Prior distributions for variance parameters in hierarchical models (comment  
657 on article by Browne and Draper). *Bayesian analysis*. 2006;1:515–34.
- 658 32. Rönnegård L, McFarlane SE, Husby A, Kawakami T, Ellegren H, Qvarnström A.  
659 Increasing the power of genome wide association studies in natural populations using  
660 repeated measures—evaluation and implementation. *Methods in ecology and evolution*.  
661 2016;7:792–9.
- 662 33. Jeffreys AJ, Holloway JK, Kauppi L, May CA, Neumann R, Slingsby MT, et al. Meiotic  
663 recombination hot spots and human DNA diversity. *Philosophical Transactions of the Royal*  
664 *Society of London Series B: Biological Sciences*. 2004;359:141–52.
- 665 34. Kent TV, Uzunović J, Wright SI. Coevolution between transposable elements and  
666 recombination. *Philosophical Transactions of the Royal Society B: Biological Sciences*.  
667 2017;372:20160458.
- 668 35. Chowdhury R, Bois PR, Feingold E, Sherman SL, Cheung VG. Genetic analysis of  
669 variation in human meiotic recombination. *PLoS genetics*. 2009;5:e1000648.

- 670 36. Kong A, Thorleifsson G, Stefansson H, Masson G, Helgason A, Gudbjartsson DF, et al.  
671 Sequence variants in the RNF212 gene associate with genome-wide recombination rate.  
672 Science. 2008;319:1398–401.
- 673 37. Kong A, Thorleifsson G, Frigge ML, Masson G, Gudbjartsson DF, Villemoes R, et al.  
674 Common and low-frequency variants associated with genome-wide recombination rate.  
675 Nature genetics. 2014;46:11.
- 676 38. Reynolds A, Qiao H, Yang Y, Chen JK, Jackson N, Biswas K, et al. RNF212 is a dosage-  
677 sensitive regulator of crossing-over during mammalian meiosis. Nature genetics.  
678 2013;45:269.
- 679 39. Dapper AL, Payseur BA. Molecular evolution of the meiotic recombination pathway in  
680 mammals. Evolution. 2019.
- 681 40. Battagin M, Gorjanc G, Faux A-M, Johnston SE, Hickey JM. Effect of manipulating  
682 recombination rates on response to selection in livestock breeding programs. Genetics  
683 Selection Evolution. 2016;48:44.
- 684 41. Bernardo R. Prospective targeted recombination and genetic gains for quantitative traits  
685 in maize. The plant genome. 2017;10.
- 686 42. Hickey JM, Kranis A. Extending long-range phasing and haplotype library imputation  
687 methods to impute genotypes on sex chromosomes. Genetics Selection Evolution.  
688 2013;45:10.
- 689
